# Supplementary material
Source: Springer Nature journal article supplement (https://www.springermedizin.de/resource/supplementary/12885_2011_2863_MOESM10_ESM.pdf/9461938)

**A**

LY : - - + +

E-Sel : - + - +

Caspase 8-  
Cleaved Caspase 8-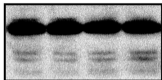**B**

PD : - - + + +

LY : - - - - +

E-Sel : - + - + +

Caspase 8-  
Cleaved Caspase 8-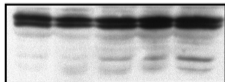

Active Caspase 3-

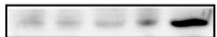

Vinculin-

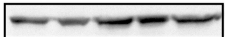

Supplement: MOESM10 [file 9461938]
